# Supplementary material for: Regulating the crystallization of tin oxide nanoparticles by an environmentally friendly poly-aluminum chloride additive for a high-quality electron transport film in perovskite solar cells
Source: Royal Society of Chemistry journal article supplement (doi:10.1039/d4tc05164e), 2025-01-01
Supplement: d4tc05164e1.pdf [file d4tc05164e1.pdf]

**Regulating Crystallization of Tin Oxide Nanoparticles by  
Environmental-friendly Poly-aluminium Chloride Additive for a  
High-Quality Electron Transport Film in Perovskite Solar Cells**

Author: Xueqi Zhang<sup>1</sup>, Disheng Yao<sup>\*1,2</sup>, Haiyue Dong<sup>1</sup>, Junzhe Han<sup>1</sup>, Wenwen Zheng<sup>1</sup>,  
Bing Zhou<sup>1</sup>, Nan Tian<sup>1</sup>, Yong Peng<sup>3</sup>, Guoyuan Zheng<sup>\*1,2</sup>, Fei Long<sup>1,2</sup>

## Experimental Section

*Materials:* SnO<sub>2</sub> colloidal dispersion (tin (IV) oxide, 12% in H<sub>2</sub>O) was purchased from Xi'an Yuri Solar Co. Ltd. N,N-dimethylformamide (DMF, 99.9%), dimethyl sulfoxide (DMSO, 99.9%), chlorobenzene (CB, 99.9%), isopropanol (IPA, 99.9%), 4-tert-butylpyridine (tBP, 99%), lithium bis (trifluoromethanesulphonyl) imide (Li-TFSI), Spiro-OMETAD, lead iodide (PbI<sub>2</sub>, 99.99%), formamidinium iodide (FAI, 99.9%), methylammonium iodide (MAI, 99.99%), methylammonium chloride (MACl, 99.99%), methylammonium bromide (MABr, 99.99%), cesium iodide (CsI, 99.99%) were purchased from Advanced Election Technology in China. Cobalt (III) FK 209 TFSI salt was purchased from TCI. Acetonitrile (anhydrous, 99.8%) was supplied by Aladdin. Polyaluminum chloride (PAC) was purchased from Adamas. All chemical reagents were used as received without further purification.

*Device fabrication:* The ITO glass was cleaned sequentially with soapy water, deionized water, acetone and anhydrous ethanol for 20 minutes each. Then UV-ozone was treated for 15 min. To prepare the SnO<sub>2</sub> precursor, the 12 wt% SnO<sub>2</sub> aqueous colloidal solution was diluted by deionized water to the concentration of 6 wt%. Then, the PAC was dissolved in deionized water and stirred at 40 °C for 1 h. The PAC solution was added into the diluted SnO<sub>2</sub> solutions to obtain the concentration required for SnO<sub>2</sub> preparation (SnO<sub>2</sub> 6 wt% and PAC 1.0 to 3.0 mg/mL), which were mixed by ultrasonication for 1 h. The pristine and modified SnO<sub>2</sub> solutions were deposited on the ITO substrates at 4000 rpm for 30 s. After then, the substrates were annealed at 150 °C

for 30 min in ambient air. After UV treatment, the ITO substrates were transferred to the glove box. The composition of the perovskite is  $(\text{Cs}_{0.05}\text{FA}_{0.54}\text{MA}_{0.41})\text{Pb}(\text{I}_{0.98}\text{Br}_{0.02})_3$ . 50  $\mu\text{L}$  of mixture (1.3M  $\text{PbI}_2$  and 5% CsI dissolved in DMF/DMSO=9/1, v/v) was spin-coated on the cooled substrate at 2500 rpm for 30 s, the films were annealed at 70  $^\circ\text{C}$  for 1 minute. 50  $\mu\text{L}$  of organic solution (FAI 0.23M: MAI 0.12M: MACl 0.07M: MABr 0.05M in 1 mL IPA) was deposited on the  $\text{PbI}_2$  film at speed of 2300 rpm for 30 s. Then, the films were annealed at 150  $^\circ\text{C}$  for 15 minutes at a relative humidity of  $40\pm 5\%$  in ambient air. The Spiro-OMeTAD was prepared by mixed with 0.0500 g Spiro-OMeTAD, 12  $\mu\text{L}$  Li-TFSI (520 mg/mL in acetonitrile), 7  $\mu\text{L}$  Co-TFSI (300 mg/mL in acetonitrile), 20  $\mu\text{L}$  tBP in 1 mL chlorobenzene, followed by depositing on the perovskite at speed of 4000 rpm for 25 s. Finally, the monolithic device was fabricated by evaporating 100 nm Au as the back electrode.

*Characterization:* All measurements involving PAC dopant were carried out at a concentration of 2.0 mg  $\text{mL}^{-1}$ . Ultraviolet Photoelectron Spectroscopy (UPS) and X-ray Photoelectron Spectroscopy (XPS) analysis were measured with Thermal Scientific ESCALAB 250Xi. The surface morphologies of perovskite films were tested by Atomic Force Microscope (AFM, Bruker Metrology Nanoscope III-D). Root-Mean-Square roughness (RMS) was calculated from atomic force microscopy (AFM) height images (Bruker Metrology Nanoscope III-D). The top-view and cross-sectional SEM images of the all samples were attained using a field-emission Scanning Electron Microscopy (S4800). The contact angle test was carried out on a contact angle analyzer

SL200B/K of American Kenor Co.Ltd. The X-ray Diffraction (XRD) patterns of all perovskite films were characterized using an X-ray diffractometer (XRD, PANalytical B.V., X Pert PRO). Optical absorption/transmission spectra of samples were measured by a UV–vis spectrometer (Shimadzu 3600). The steady state PL and Time-resolved PL spectra were measured by an Edinburgh FLS 1000 spectrometer. The EIS measurements were performed by an electrochemical workstation (CHI660E). External quantum efficiency (EQE) measurement was carried out using a QE-R (Enlitech). All the devices were tested with a defined active area of 0.0625 cm<sup>2</sup> and a scan rate of 10 mV s<sup>-1</sup>.

*Calculations:* The UPS results were calculated from the follow equations:

$$E_{\text{F}} = E_{\text{cut-off}} - 21.22 \quad (1)$$

$$E_{\text{VB}} = E_{\text{F}} - E_{\text{F, edge}} \quad (2)$$

$$E_{\text{CB}} = E_{\text{VB}} + E_{\text{g}} \quad (3)$$

Here, the photon energy of Type I for Helium is given as 21.22 eV.

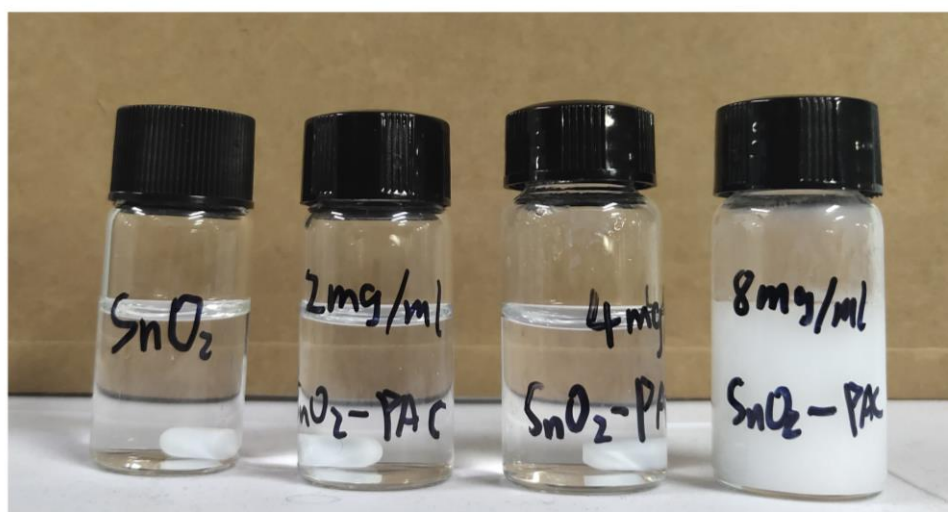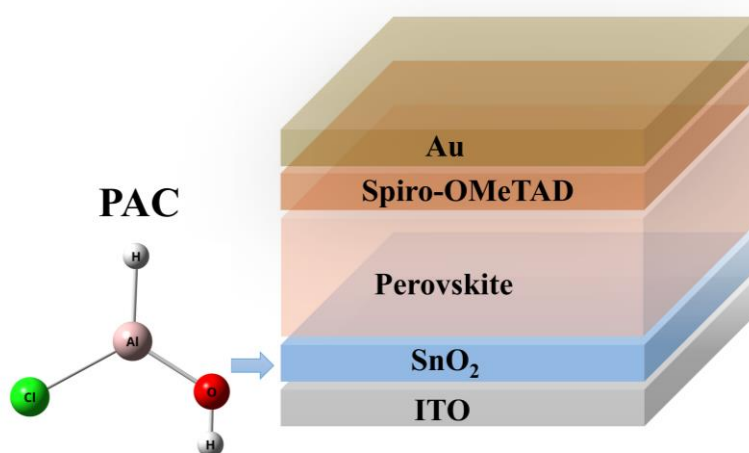

**Figure S1.** Photographs of  $\text{SnO}_2$  solution with different concentrations of PAC and schematic device structure of the PSCs.

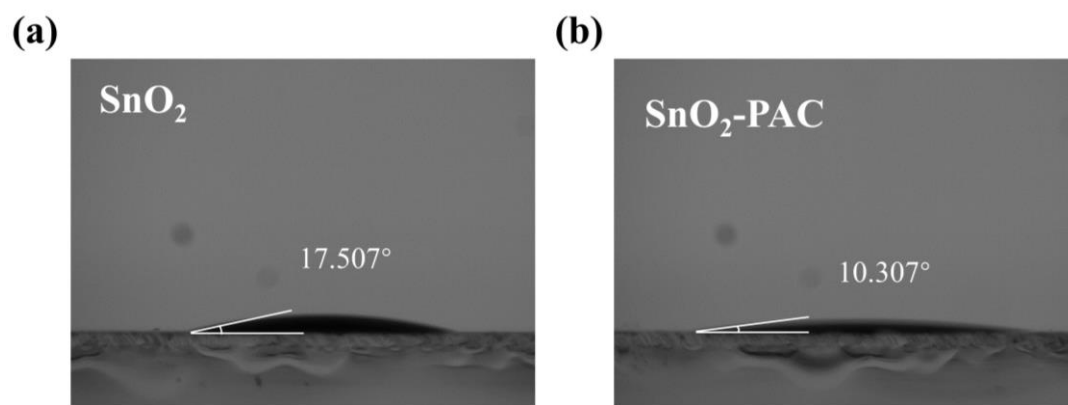

**Figure S2.** Contact angles of DMF on SnO<sub>2</sub> and SnO<sub>2</sub>-PAC films.

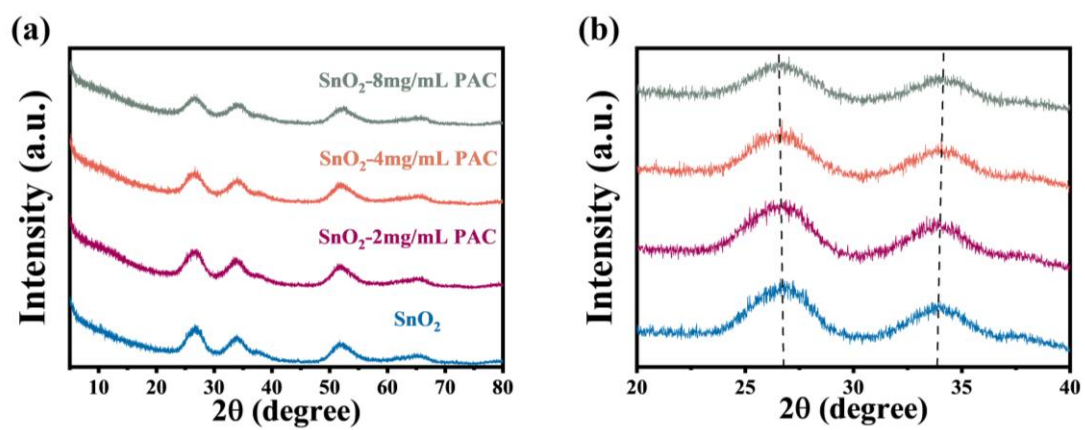

**Figure S3.** XRD patterns of SnO<sub>2</sub> powders with different concentrations of PAC.

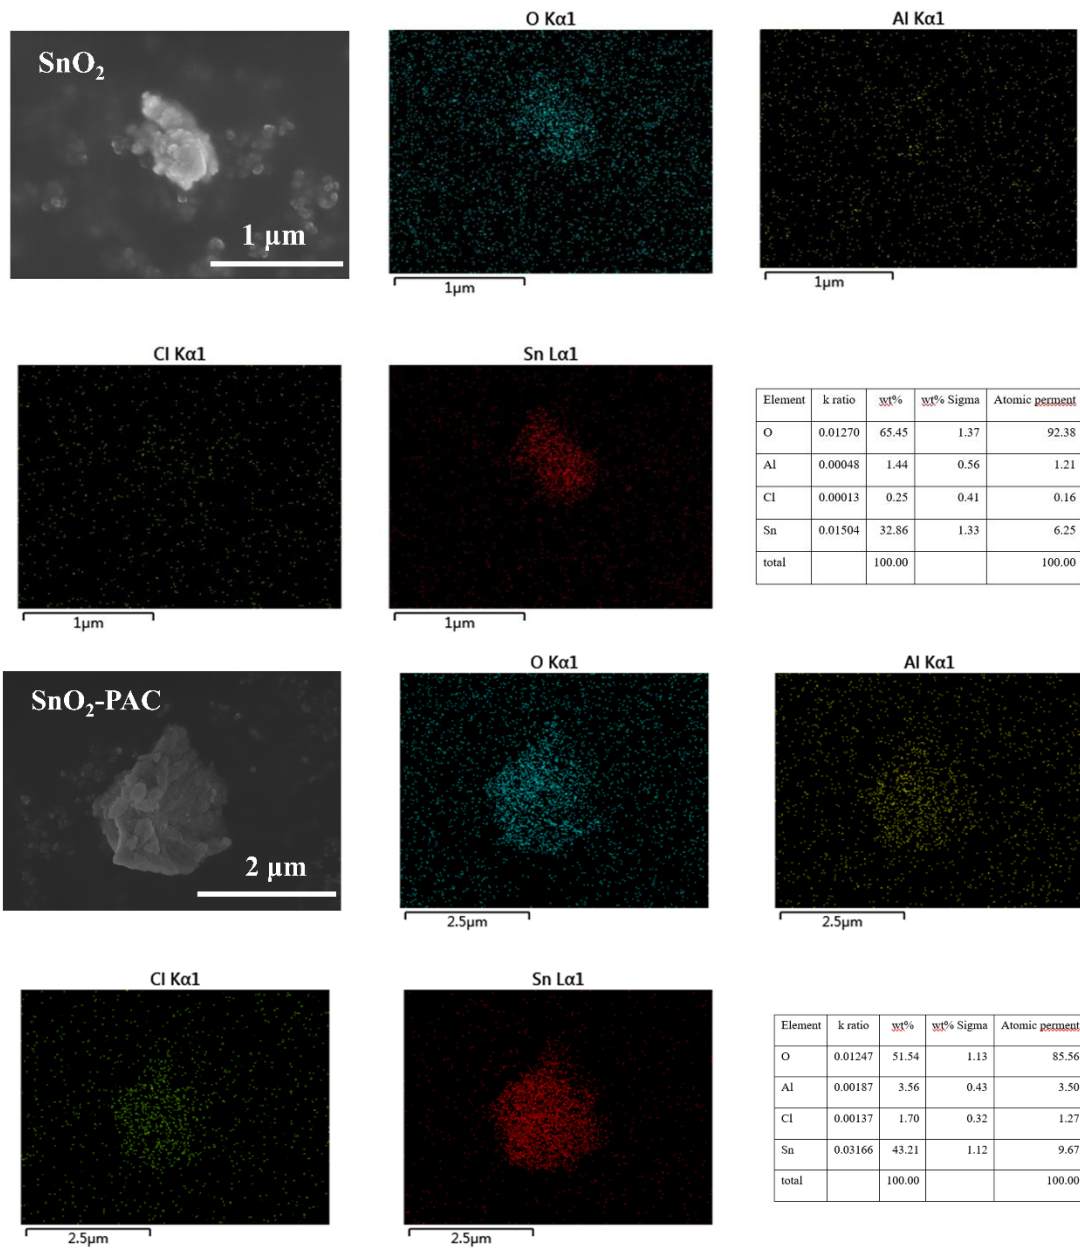

**Figure S4.** EDS of SnO<sub>2</sub> and SnO<sub>2</sub>-PAC powders.



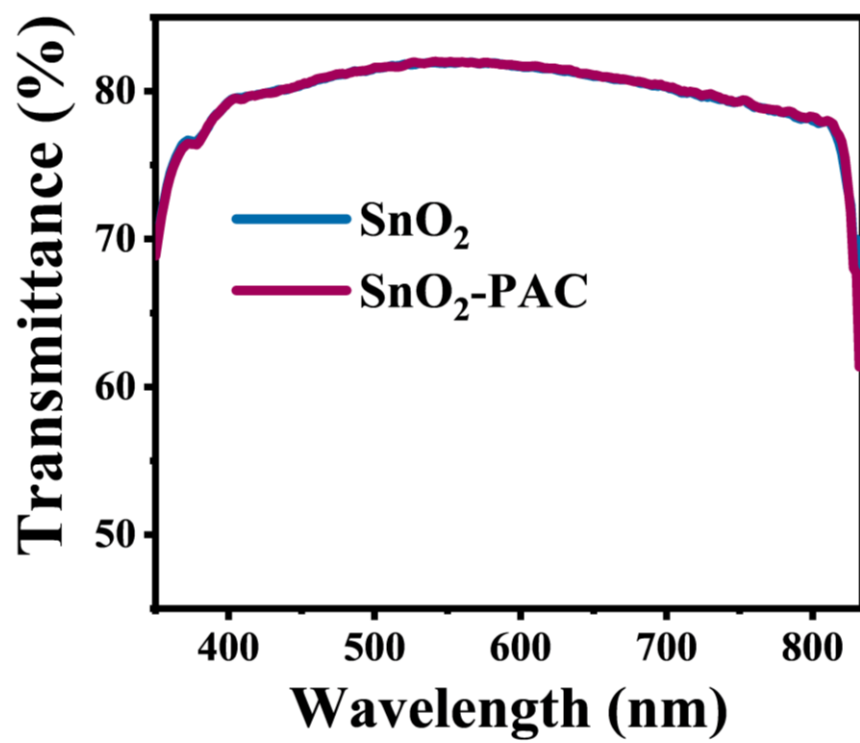

**Figure S5.** Spectra of light transmittance of different ETL films.

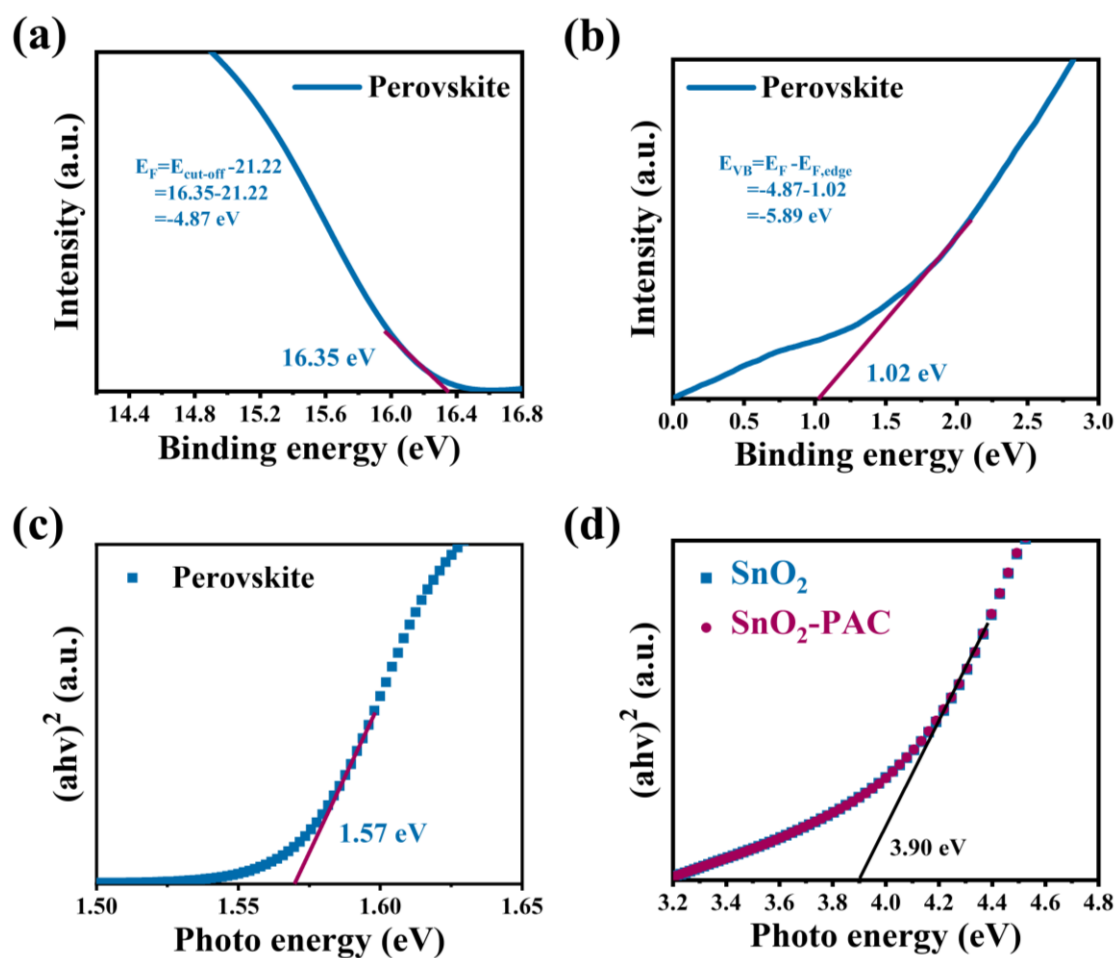

**Figure S6.** (a, b) UPS of the perovskite film. (c) and (d) are the Tauc curves of perovskite film and SnO<sub>2</sub> films with or without PAC.

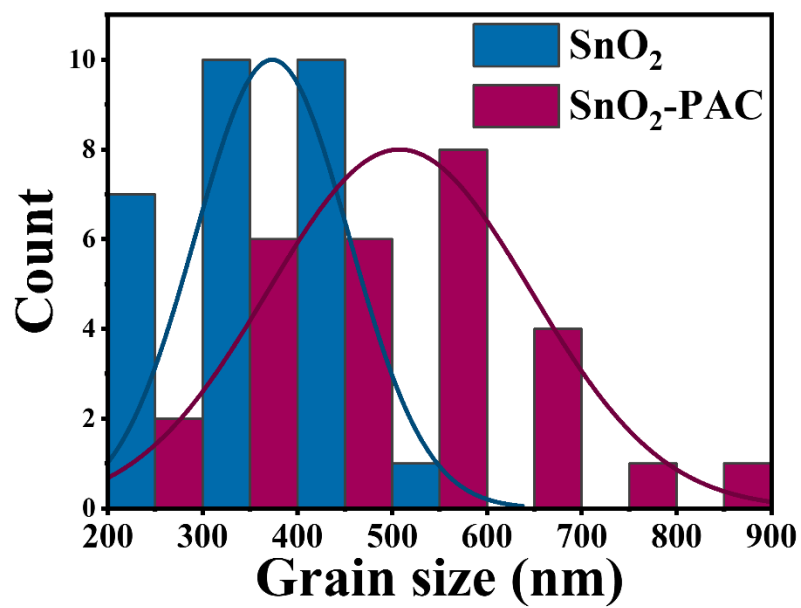

**Figure S7.** Grain size histograms for perovskite films prepared on pristine SnO<sub>2</sub> and SnO<sub>2</sub>-PAC.

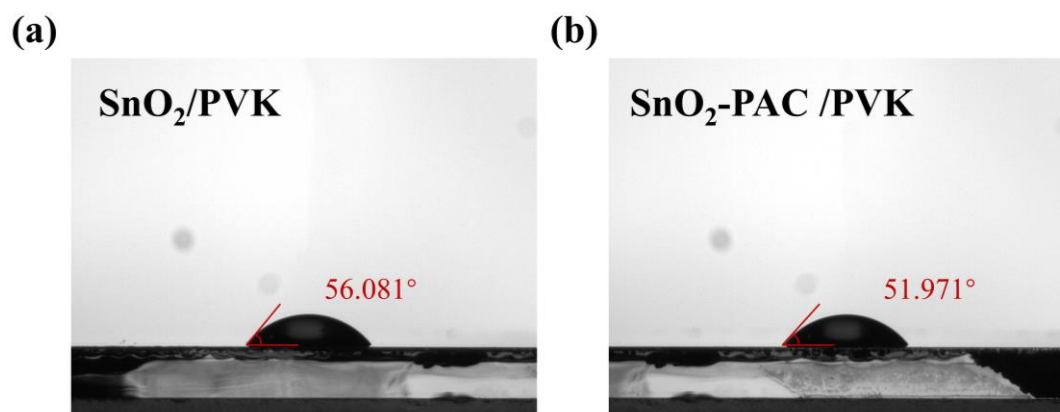

**Figure S8.** Contact angles of perovskite films deposited on the SnO<sub>2</sub> and SnO<sub>2</sub>-PAC.

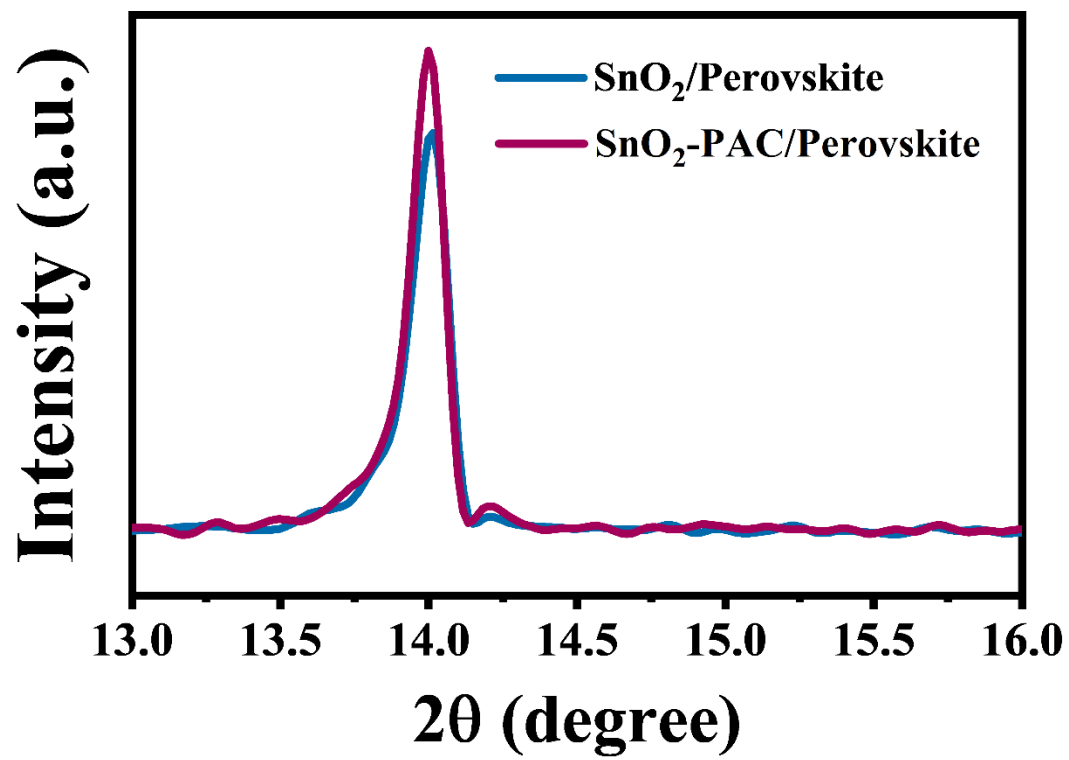

**Figure S9.** XRD patterns of the perovskite films at (110) plane.

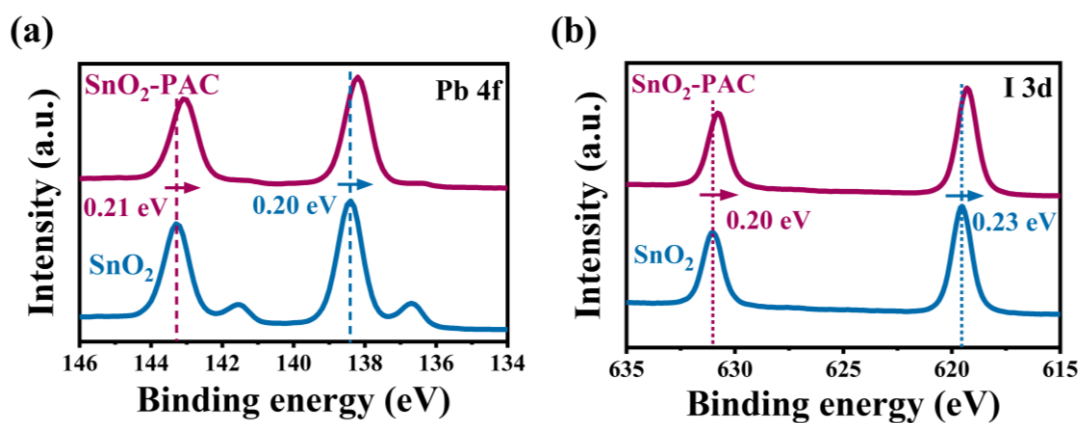

Figure S10. XPS spectra of the perovskite films: (a) Pb 4f and (b) I 3d.

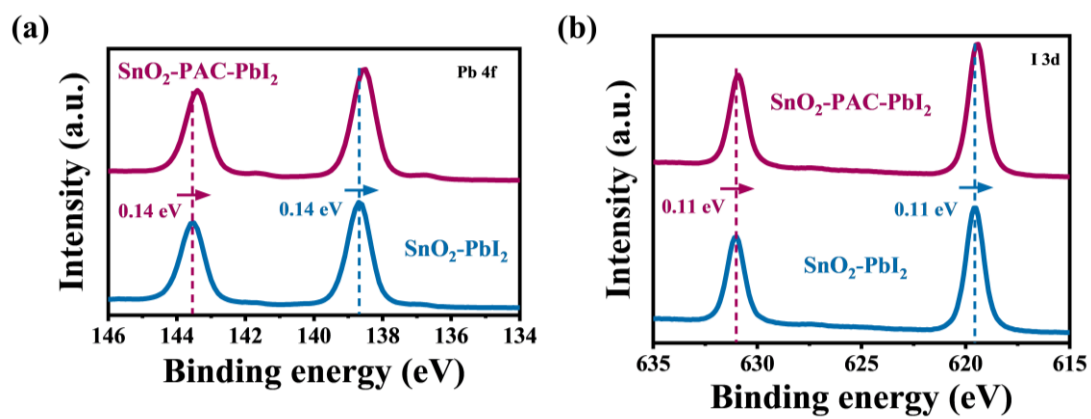

**Figure S11.** XPS spectra of the PbI<sub>2</sub> films: (a) Pb 4f and (b) I 3d.

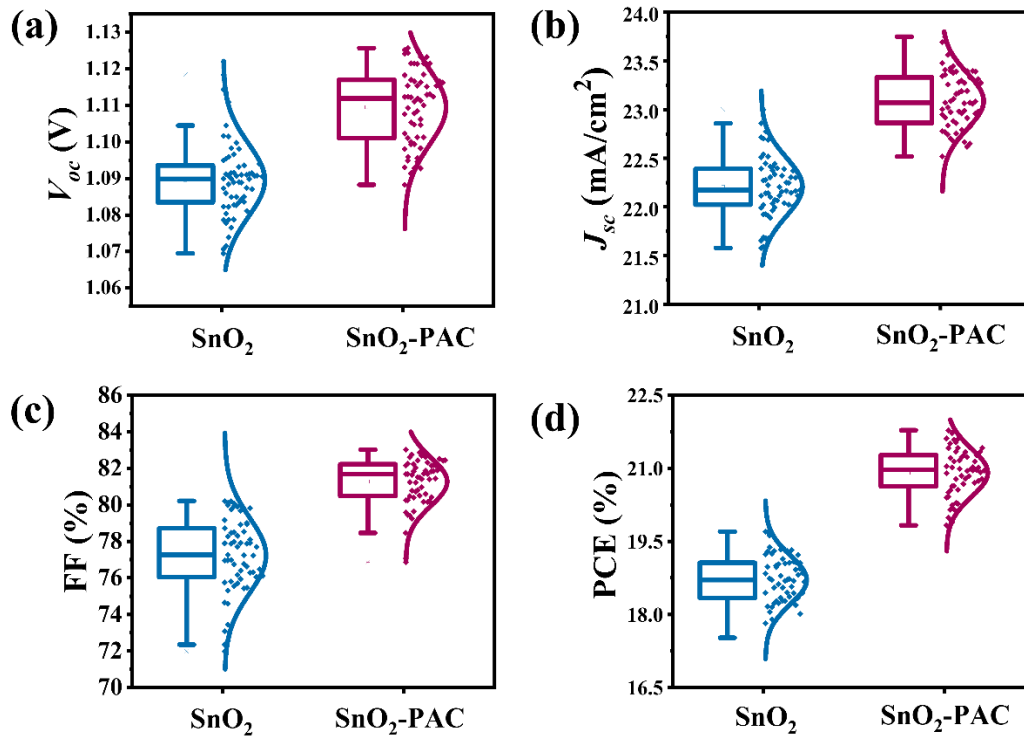

**Figure S12.** Statistics of (a)  $V_{oc}$ , (b)  $J_{sc}$ , (c) FF, and (d) PCE for PSCs made by using  $\text{SnO}_2$  and  $\text{SnO}_2\text{-PAC}$  as ETL.



**Table S1.** the full width at half maximum (FWHM) parameters of prominent peaks of the perovskite films deposited on pristine SnO<sub>2</sub> and SnO<sub>2</sub>-PAC.

| <b>Sample</b>         | <b>FWHM<br/>(110)</b> | <b>FWHM<br/>(121)</b> | <b>FWHM<br/>(220)</b> |
|-----------------------|-----------------------|-----------------------|-----------------------|
| SnO <sub>2</sub>      | 0.162                 | 0.177                 | 0.195                 |
| SnO <sub>2</sub> -PAC | 0.156                 | 0.135                 | 0.157                 |

**Table S2.** Electrochemical impedance parameter table of SnO<sub>2</sub> and SnO<sub>2</sub>-PAC.

| PSCs with<br>different ETLs | $R_s$ ( $\Omega$ ) | $R_{rec}$ ( $\Omega$ ) | CPE (F)               |
|-----------------------------|--------------------|------------------------|-----------------------|
| SnO <sub>2</sub>            | 10.98              | 30527                  | $1.16 \times 10^{-8}$ |
| SnO <sub>2</sub> -PAC       | 4.78               | 47866                  | $1.12 \times 10^{-8}$ |

**Table S3.** Fitted results of TRPL spectra of the perovskite films deposited on pristine SnO<sub>2</sub> and SnO<sub>2</sub>-PAC.

| ETL                   | $A_1$ | $\tau_1$ (ns) | $A_2$ | $\tau_2$ (ns) | $\tau_{ave}$ (ns) |
|-----------------------|-------|---------------|-------|---------------|-------------------|
| SnO <sub>2</sub>      | 0.45  | 22.87         | 0.51  | 94.15         | 81.57             |
| SnO <sub>2</sub> -PAC | 0.29  | 19.49         | 0.66  | 63.93         | 59.19             |

**Table S4.** Performance parameters of PSCs made by using different concentrations of PAC in SnO<sub>2</sub> solutions.

| PAC<br>(mg/mL) |          | $V_{oc}$ (V) | $J_{sc}$ (mA/cm <sup>2</sup> ) | FF (%) | PCE (%) |
|----------------|----------|--------------|--------------------------------|--------|---------|
| 0              | Champion | 1.11         | 23.38                          | 77.06  | 20.02   |
|                | Average  | 1.11         | 23.54                          | 76.23  | 19.86   |
| 1              | Champion | 1.13         | 22.02                          | 82.03  | 20.31   |
|                | Average  | 1.11         | 22.10                          | 80.13  | 19.60   |
| 2              | Champion | 1.13         | 24.72                          | 81.24  | 22.67   |
|                | Average  | 1.11         | 23.59                          | 80.76  | 21.17   |
| 2.5            | Champion | 1.12         | 23.81                          | 78.65  | 21.02   |
|                | Average  | 1.11         | 22.67                          | 79.84  | 20.07   |
| 3              | Champion | 1.10         | 22.47                          | 81.11  | 20.06   |
|                | Average  | 1.10         | 22.16                          | 79.87  | 19.54   |

**Table S5.** The hysteresis behavior of two representative PSCs without and with PAC treatment.

| ETLs                  | Scan direction | $V_{oc}$ (V) | $J_{sc}$ (mA/cm <sup>2</sup> ) | FF (%) | PCE (%) | HI (%) |
|-----------------------|----------------|--------------|--------------------------------|--------|---------|--------|
| SnO <sub>2</sub>      | Reverse        | 1.11         | 23.38                          | 77.06  | 20.02   | 6.0%   |
|                       | Forward        | 1.11         | 23.08                          | 73.36  | 18.81   |        |
| SnO <sub>2</sub> -PAC | Reverse        | 1.13         | 24.72                          | 81.24  | 22.67   | 3.3%   |
|                       | Forward        | 1.13         | 24.07                          | 80.61  | 21.93   |        |
